# Supplementary material for: Association between metabolic syndrome and humoral immune response to Pfizer–BioNTech vaccine in healthcare workers
Source: bioRxiv or medRxiv preprint supplement (doi:10.1101/2022.04.13.22273853), 2022-04-16
Supplement: Supplementary file [file media-1.pdf]

**Supplementary table 1: Characteristics of included versus excluded participants**

| Characteristics                                       | Excluded participants | Included participants |
|-------------------------------------------------------|-----------------------|-----------------------|
| N                                                     | 1753                  | 946                   |
| Age, mean [SD]                                        | 38.9 (12.0)           | 36.7 (12.3)           |
| Sex (men)                                             | 484 (27.6)            | 298 (31.5)            |
| Smoking                                               |                       |                       |
| Non-smoker                                            | 1482 (84.5)           | 855 (90.4)            |
| Smoker                                                | 271 (15.5)            | 91 (9.6)              |
| Alcohol consumption                                   |                       |                       |
| Non-drinker                                           | 713 (40.7)            | 355 (37.5)            |
| Drinker consuming                                     |                       |                       |
| < 1 go/day                                            | 757 (43.3)            | 442 (46.7)            |
| ≥ 1 go/day                                            | 280 (16.0)            | 149 (15.8)            |
| Missing                                               | 3                     |                       |
| Leisure time physical activity                        |                       |                       |
| Non-engagement                                        | 375 (21.4)            | 197 (20.8)            |
| < 150 min/week                                        | 1220 (69.7)           | 657 (69.5)            |
| ≥ 150 min/week                                        | 156 (8.9)             | 92 (9.7)              |
| Missing                                               | 2                     |                       |
| Comorbidity                                           | 91 (5.2)              | 29 (3.1)              |
| Lung disease                                          | 62 (3.5)              | 18 (1.9)              |
| Heart disease                                         | 22 (1.3)              | 5 (0.5)               |
| Cancer                                                | 17 (1.0)              | 6 (0.6)               |
| History of SARS-Cov-2 infection <sup>a</sup>          | 27 (1.5)              | 5 (0.5)               |
| Vaccine-to-IgG test days, median [range] <sup>b</sup> | 62 [5-103]            | 67 [15-103]           |
| Missing                                               | 220                   | 0                     |
| SARS-Cov-2 spike IgG (AU/mL), median [range]          | 5708 [0-61922]        | 5588 [135-36962]      |
| Missing                                               | 16                    | 0                     |
| Central obesity <sup>c</sup>                          | 203 (21.9)            | 187 (19.8)            |
| Missing                                               | 826                   |                       |
| High BP <sup>d</sup>                                  | 256 (25.1)            | 213 (22.5)            |
| Missing                                               | 732                   |                       |
| High FPG <sup>e</sup>                                 | 17 (18.3)             | 65 (6.9)              |
| Missing                                               | 1660                  |                       |
| High TG <sup>f</sup>                                  | 159 (16.0)            | 93 (9.8)              |
| Missing                                               | 761                   |                       |
| Reduced HDL-C <sup>g</sup>                            | 45 (3.7)              | 30 (3.2)              |
| Missing                                               | 535                   |                       |

Values are n (%), unless otherwise stated; SD: standard deviation; IgG: immunoglobulin G;

<sup>a</sup> positive result of either polymerase chain reaction test or the measurement of antibodies against SARS-CoV-2 nucleocapsid protein; <sup>b</sup> time interval between the second dose of vaccine and the day of blood draw;

<sup>c</sup> waist circumference ≥ 90 cm for men, or ≥ 80 cm for women; <sup>d</sup> systolic blood pressure [BP] ≥ 130 mmHg, diastolic BP ≥ 85 mmHg or using antihypertensive medication; <sup>e</sup> fasting plasma glucose ≥ 100 mg/dL or using antidiabetic medication; <sup>f</sup> triglycerides ≥ 150 mg/dL or using lipid-lowering medication; <sup>g</sup> high-density lipoprotein cholesterol < 40 mg/dL for men, or < 50 mg/dL for women.

**Supplementary table 2: Association between MetS and SARS-Cov-2 spike IgG titers, excluding those with history of SARS-Cov-2 infection and those with comorbid cancer, heart or lung diseases**

| MetS/ number of MetS components                | N                     | SARS-Cov-2 spike IgG |                   |                   |              |
|------------------------------------------------|-----------------------|----------------------|-------------------|-------------------|--------------|
|                                                |                       | Model 1              |                   | Model 2           |              |
|                                                |                       | GMT (95% CI)         | GMR (95% CI)      | GMT (95% CI)      | GMR (95% CI) |
| <b>Metabolic syndrome</b>                      |                       |                      |                   |                   |              |
| MetS (-)                                       | 865 5309 (5049, 5582) | 1.00 (ref)           | 5051 (4636, 5503) | 1.00 (ref)        |              |
| MetS (+)                                       | 47 4020 (3278, 4929)  | 0.76 (0.61, 0.93)    | 3816 (3136, 4644) | 0.76 (0.62, 0.92) |              |
| <b>Number of metabolic syndrome components</b> |                       |                      |                   |                   |              |
| 0                                              | 552 5387 (5046, 5750) | 1.00 (ref)           | 5057 (4593, 5568) | 1.00 (ref)        |              |
| 1                                              | 225 5425 (4944, 5952) | 1.01 (0.90, 1.13)    | 5217 (4686, 5807) | 1.03 (0.93, 1.15) |              |
| 2                                              | 88 4678 (4022, 5440)  | 0.87 (0.73, 1.03)    | 4550 (3882, 5331) | 0.90 (0.77, 1.05) |              |
| 3                                              | 30 4233 (3282, 5459)  | 0.79 (0.60, 1.03)    | 4245 (3335, 5404) | 0.84 (0.66, 1.07) |              |
| ≥ 4                                            | 17 3554 (2548, 4957)  | 0.66 (0.47, 0.93)    | 3094 (2270, 4218) | 0.61 (0.45, 0.84) |              |
| P for trend                                    |                       | 0.006                |                   | 0.006             |              |

MetS: Metabolic syndrome; GMT: geometric mean titers; GMR: geometric mean ratio; ref: reference; Model 1: adjusted for age and sex; Model 2: adjusted for age, sex, smoking, alcohol consumption, leisure time physical activity, and time interval (in day) between the second vaccination and the day of blood draw
